# Supplementary material
Source: PubMed Central journal article supplement (PMC2799496)
Supplement: NIHMS163167-supplement-Supplementary_Data.pdf [file NIHMS163167-supplement-Supplementary_Data.pdf]

**Supplementary Table 1: Locostatin inhibits a CD8<sup>+</sup> T cell cytokine storm.**

| Cytokine (pg/ml) | <i>No locostatin</i> |        | <i>16 μM locostatin</i> |        | <i>50 μM locostatin</i> |        | <i>150 μM locostatin</i> |        |
|------------------|----------------------|--------|-------------------------|--------|-------------------------|--------|--------------------------|--------|
|                  | + SIINFEKL           | -      | +                       | -      | +                       | -      | +                        | -      |
| <b>IL-1α</b>     | <b>119.26</b>        | 31.28  | 48.04                   | 26.93  | <b>27.48</b>            | 31.18  | 25.36                    | 32.58  |
| <b>IL-1β</b>     | <b>445.74</b>        | 7.77   | 164.27                  | 58.08  | <b>13.76</b>            | 6.43   | ≤5.5                     | ≤5.5   |
| <b>IL-2</b>      | <b>4758.5</b>        | 6.16   | 196.97                  | 2.71   | <b>2.90</b>             | ≤2     | ≤2                       | ≤2     |
| <b>IL-3</b>      | <b>224.1</b>         | 3.50   | 12.38                   | 1.13   | <b>≤1</b>               | ≤1     | ≤1                       | ≤1     |
| <b>IL-4</b>      | <b>12.02</b>         | 1.52   | 3.17                    | 1.43   | <b>1.66</b>             | 1.68   | 1.35                     | 1.95   |
| <b>IL-5</b>      | <b>22.33</b>         | 2.85   | 6.14                    | ≤2.5   | <b>≤2.5</b>             | ≤2.5   | ≤2.5                     | ≤2.5   |
| <b>IL-6</b>      | <b>2668.45</b>       | 346.64 | 759.02                  | 265.99 | <b>71.29</b>            | 24.49  | ≤2                       | 2.48   |
| <b>IL-9</b>      | <b>254.50</b>        | 122.47 | 151.02                  | 80.28  | <b>36.81</b>            | ≤36.5  | ≤36.5                    | ≤36.5  |
| <b>IL-10</b>     | <b>219.35</b>        | 9.72   | 188.47                  | ≤5.5   | <b>6.67</b>             | ≤5.5   | ≤5.5                     | ≤5.5   |
| <b>IL-12</b>     | <b>64.3</b>          | 99.37  | 29.20                   | 21.85  | <b>16.03</b>            | 13.83  | 10.67                    | 13.29  |
| <b>MCP-1</b>     | <b>1384.96</b>       | 691.54 | 173.21                  | 78.19  | <b>38.34</b>            | 26.39  | 26.65                    | 35.55  |
| <b>IFNγ</b>      | <b>586511.2</b>      | 51.02  | 53217.54                | 23.38  | <b>79.79</b>            | 25.93  | ≤20                      | ≤20    |
| <b>TNFα</b>      | <b>1859.01</b>       | 25.32  | 413.97                  | 8.59   | <b>110.36</b>           | 7.13   | 9.73                     | ≤5     |
| <b>MIP-1α</b>    | <b>327677.05</b>     | 207.67 | 133184.40               | 118.01 | <b>1803.20</b>          | 70.55  | 98.98                    | 77.20  |
| <b>GM-CSF</b>    | <b>1096.33</b>       | 9.34   | 183.80                  | 2.65   | <b>3.24</b>             | ≤1.5   | ≤1.5                     | ≤1.5   |
| <b>RANTES</b>    | <b>17105.43</b>      | 644.10 | 15547.65                | 509.42 | <b>2811.63</b>          | 862.97 | 1536.09                  | 794.77 |

C57BL/6 mice adoptively transferred with 150,000 OT-I cells were immunized with OVA, poly I:C and anti-4-1BB (CD137) antibody and rested for 6 days. Spleen cells were harvested and stimulated *in vitro* with 100μg SIINFEKL peptide or vehicle in presence of increasing doses of locostatin. After 16 hours supernatants were obtained and sent to Quansys Biosciences (Logan Utah) for cytokine analysis.
